# Supplementary material
Source: PubMed Central journal article supplement (PMC7755007)
Supplement: ciaa026_suppl_supplementary_materials.pdf [file ciaa026_suppl_supplementary_materials.pdf]

Supplementary Materials

**Supplementary Table S-1 Baseline demographics, HIV & metabolic parameters for HIV-infected non-Hispanic black women, at Index visit, stratified by haplogroups.**

|                                                   | <b>L0L1 (N: 219)</b> | <b>L2 (N: 269)</b>   | <b>L3 (N: 351)</b>  | <b>African Other<br/>(N: 94)</b> | <b>P value<sup>a</sup></b> |
|---------------------------------------------------|----------------------|----------------------|---------------------|----------------------------------|----------------------------|
| <b>Year of first glucose/A1c</b>                  | 2002(2001, 2004)     | 2002(2001, 2004)     | 2002(2001, 2003)    | 2002(2001, 2003)                 | 0.2301                     |
| <b>Age/birth year</b>                             | 41.2(35.5, 47.2)     | 39.2(32.9, 46.2)     | 41.2(34.7, 46.7)    | 39.0(32.8, 44.1)                 | 0.0513                     |
| <b>BMI</b>                                        | 27.3(23.8, 32.4)     | 27.7(23.6, 32.7)     | 28.1(23.8, 33.8)    | 26.6(23.6, 32.9)                 | 0.6208                     |
| <b>CD4 at first glucose/A1c</b>                   | 477.0(264.0, 611.0)  | 422.0(265.0, 618.0)  | 448.5(306.0, 653.0) | 428.5(264.5, 665.5)              | 0.4185                     |
| <b>Detectable (&gt;400 cps/mL) plasma HIV RNA</b> | 116 (54)             | 142 (53)             | 194 (56)            | 53 (56)                          | 0.9293                     |
| <b>On ART at index visit</b>                      | 125 (58)             | 144 (54)             | 183 (53)            | 48 (51)                          | 0.6256                     |
| <b>Plasma HIV RNA</b>                             | 580.0(80.0, 9900.0)  | 740.0(80.0, 11000.0) | 930.0(80.0, 8300.0) | 1300.0(80.0, 14000.0)            | 0.0600                     |
| <b>Total cholesterol</b>                          | 175.0(153.0, 205.0)  | 177.0(152.0, 201.0)  | 170.0(148.0, 203.0) | 173.0(146.0, 197.0)              | 0.6557                     |
| <b>LDL cholesterol</b>                            | 98.5(79.0, 130.0)    | 103.0(81.0, 126.0)   | 98.0(78.0, 124.0)   | 96.0(78.5, 118.5)                | 0.8255                     |
| <b>HDL cholesterol</b>                            | 47.5(38.0, 62.0)     | 49.0(37.0, 62.0)     | 48.0(38.0, 59.0)    | 44.5(35.0, 60.0)                 | 0.3741                     |
| <b>Triglycerides</b>                              | 104.0(76.0, 154.0)   | 99.0(72.0, 142.0)    | 102.0(73.0, 151.0)  | 108.0(80.0, 168.0)               | 0.2022                     |
| <b>Glucose</b>                                    | 84.0(79.0, 91.0)     | 84.0(78.0, 91.0)     | 84.0(79.0, 91.0)    | 82.0(77.0, 90.0)                 | 0.6474                     |
| <b>Insulin</b>                                    | 10.0(7.0, 18.0)      | 10.0(7.0, 16.0)      | 10.0(6.0, 17.0)     | 8.0(5.0, 17.0)                   | 0.6459                     |
| <b>HOMA IR</b>                                    | 2.2(1.4, 3.7)        | 2.1(1.3, 3.3)        | 2.1(1.3, 3.7)       | 1.8(1.0, 3.8)                    | 0.7723                     |
| <b>HOMA B</b>                                     | 180.0(114.5, 288.0)  | 189.5(117.0, 300.0)  | 172.8(114.9, 280.0) | 164.2(108.0, 248.3)              | 0.4321                     |

<sup>a</sup>p value tested by ANOVA

**Supplementary Table S-2 Baseline demographics, HIV & metabolic parameters for HIV-uninfected non-Hispanic black women, at Index visit, stratified by haplogroups.**

|                                  | <b>L0L1 (N: 81)</b>  | <b>L2 (N: 98)</b>    | <b>L3 (N: 127)</b>   | <b>African Other<br/>(N: 49)</b> | <b>P value<sup>a</sup></b> |
|----------------------------------|----------------------|----------------------|----------------------|----------------------------------|----------------------------|
| <b>Year of first glucose/A1c</b> | 2002(2001, 2003)     | 2002(2001, 2003)     | 2002(2001, 2004)     | 2002(2002, 2004)                 | 0.6643                     |
| <b>Age/birth year</b>            | 38.8(31.6, 46.9)     | 40.3(32.3, 45.9)     | 37.4(27.4, 43.3)     | 37.6(28.5, 42.3)                 | 0.0586                     |
| <b>BMI</b>                       | 27.6(24.3, 31.9)     | 29.1(23.3, 34.5)     | 28.2(23.4, 34.5)     | 27.8(23.8, 34.6)                 | 0.9057                     |
| <b>CD4 at first glucose/A1c</b>  | 997.0(832.0, 1248.0) | 911.5(734.5, 1226.5) | 855.0(707.0, 1184.0) | 986.0(681.0, 1153.0)             | 0.3891                     |
| <b>Total cholesterol</b>         | 170.0(152.0, 199.0)  | 175.0(150.0, 203.0)  | 178.0(153.0, 201.0)  | 190.0(166.0, 206.0)              | 0.5875                     |
| <b>LDL cholesterol</b>           | 97.0(86.0, 116.0)    | 94.0(75.0, 120.0)    | 106.5(79.0, 131.0)   | 99.0(88.0, 123.0)                | 0.6091                     |
| <b>HDL cholesterol</b>           | 56.0(47.0, 67.0)     | 57.0(47.0, 68.0)     | 54.0(44.0, 63.0)     | 59.0(48.0, 76.0)                 | 0.0202                     |
| <b>Triglycerides</b>             | 76.0(53.0, 97.0)     | 82.5(58.0, 130.0)    | 73.0(53.0, 108.0)    | 81.0(58.0, 114.0)                | 0.5502                     |
| <b>Glucose</b>                   | 81.0(77.0, 90.0)     | 84.0(77.0, 92.0)     | 83.0(77.0, 90.0)     | 83.0(74.0, 91.0)                 | 0.6014                     |
| <b>Insulin</b>                   | 8.0(5.0, 15.0)       | 9.0(5.0, 16.0)       | 8.0(4.0, 13.0)       | 8.0(5.0, 13.0)                   | 0.6916                     |
| <b>HOMA IR</b>                   | 1.6(1.0, 2.7)        | 1.8(1.1, 3.5)        | 1.7(0.9, 3.1)        | 1.7(0.9, 3.0)                    | 0.7023                     |
| <b>HOMA B</b>                    | 160.0(90.0, 240.0)   | 164.7(103.9, 257.1)  | 144.0(101.5, 240.0)  | 144.0(102.9, 231.4)              | 0.8184                     |

<sup>a</sup>p value tested by ANOVA

**Supplementary Table S-3. Longitudinal change in HOMA-IR by mtDNA haplogroups**

|                      |           | HIV seronegative |        |         |                              |        |         | HIV seropositive |        |         |                              |        |         |
|----------------------|-----------|------------------|--------|---------|------------------------------|--------|---------|------------------|--------|---------|------------------------------|--------|---------|
|                      |           | Crude Estimation |        |         | Full Estimation <sup>a</sup> |        |         | Crude Estimation |        |         | Full Estimation <sup>b</sup> |        |         |
| Models               | Variables | Estimates        | SE     | P-value | Estimates                    | SE     | P-value | Estimates        | SE     | P-value | Estimates                    | SE     | P-value |
| L0L1 vs.<br>non-L0L1 | AGE       | -0.0089          | 0.0027 | 0.0011  | 0.0067                       | 0.0021 | 0.0015  | -0.0011          | 0.0018 | 0.5410  | 0.0081                       | 0.0014 | <.0001  |
|                      | L0L1      | -0.0619          | 0.2582 | 0.8106  | 0.2420                       | 0.1916 | 0.2070  | 0.3702           | 0.1790 | 0.0386  | 0.1347                       | 0.1355 | 0.3205  |
|                      | AGE*L0L1  | 0.0038           | 0.0056 | 0.4943  | -0.0049                      | 0.0042 | 0.2435  | -0.0077          | 0.0038 | 0.0441  | -0.0020                      | 0.0029 | 0.4995  |
| L2 vs.<br>non-L2     | AGE       | -0.0083          | 0.0028 | 0.0035  | 0.0048                       | 0.0022 | 0.0259  | -0.0033          | 0.0019 | 0.0780  | 0.0083                       | 0.0015 | <.0001  |
|                      | L2        | -0.0581          | 0.2391 | 0.8082  | -0.0685                      | 0.1777 | 0.6998  | -0.0871          | 0.1592 | 0.5843  | 0.0431                       | 0.1198 | 0.7189  |
|                      | AGE*L2    | 0.0014           | 0.0052 | 0.7830  | 0.0023                       | 0.0039 | 0.5531  | 0.0019           | 0.0035 | 0.5751  | -0.0018                      | 0.0026 | 0.4881  |
| L3 vs.<br>non-L3     | AGE       | -0.0082          | 0.0030 | 0.0054  | 0.0038                       | 0.0023 | 0.0936  | -0.0039          | 0.0020 | 0.0561  | 0.0075                       | 0.0016 | <.0001  |
|                      | L3        | -0.0485          | 0.2206 | 0.8261  | -0.2201                      | 0.1642 | 0.1805  | -0.0984          | 0.1497 | 0.5109  | -0.0047                      | 0.1131 | 0.9666  |
|                      | AGE*L3    | 0.0011           | 0.0050 | 0.8219  | 0.0052                       | 0.0038 | 0.1622  | 0.0028           | 0.0032 | 0.3803  | 0.0007                       | 0.0024 | 0.7738  |

<sup>a</sup> Models adjusted for BMI and time-varying HOMA-B

<sup>b</sup> Models adjusted for BMI, time-varying HOMA-B, CD4 counts, detectable HIV RNA, and cART use.

**Supplementary Table S-4. Association between mitochondrial DNA haplogroups and diabetes mellitus incidence among non-Hispanic black women by HIV status in WIHS**

|                          | HIV seropositive |             |         |                              |             |         | HIV seronegative |             |         |                              |             |         |
|--------------------------|------------------|-------------|---------|------------------------------|-------------|---------|------------------|-------------|---------|------------------------------|-------------|---------|
|                          | Crude Estimation |             |         | Full Estimation <sup>a</sup> |             |         | Crude Estimation |             |         | Full Estimation <sup>b</sup> |             |         |
|                          | HR               | 95% CI      | P-value | HR                           | 95% CI      | P-value | HR               | 95% CI      | P-value | HR                           | 95% CI      | P-value |
| <b>L0L1 vs. non-L0L1</b> | 0.925            | (0.60,1.41) | 0.7177  | 0.967                        | (0.62,1.51) | 0.8818  | 0.934            | (0.47,1.84) | 0.8437  | 0.885                        | (0.45,1.74) | 0.7227  |
| <b>L2 vs. non-L2</b>     | 0.546            | (0.35,0.85) | 0.0076  | 0.514                        | (0.32,0.82) | 0.0058  | 1.37             | (0.76,2.47) | 0.2943  | 1.384                        | (0.76,2.52) | 0.2891  |
| <b>L3 vs. non-L3</b>     | 1.602            | (1.13,2.27) | 0.0079  | 1.563                        | (1.09,2.24) | 0.0157  | 1.111            | (0.63,1.97) | 0.7171  | 1.203                        | (0.67,2.15) | 0.5323  |

<sup>a</sup> Models adjusted for age, BMI, cART, CD4 cell counts and detectable plasma RNA

<sup>b</sup> Models adjusted for age and BMI

**Supplementary Table S-5. Longitudinal change of HOMA-B by mtDNA haplogroups adjusted for genetic ancestry components\*.**

|                |           | HIV Negative     |        |         |                 |        |         | HIV Positive     |        |         |                 |        |         |
|----------------|-----------|------------------|--------|---------|-----------------|--------|---------|------------------|--------|---------|-----------------|--------|---------|
|                |           | Crude Estimation |        |         | Full Estimation |        |         | Crude Estimation |        |         | Full Estimation |        |         |
| Models         | Variables | Estimates        | SE     | P-value | Estimates       | SE     | P-value | Estimates        | SE     | P-value | Estimates       | SE     | P-value |
| L0L1 vs. Other | AGE       | -0.0306          | 0.0025 | <.0001  | -0.0252         | 0.0020 | <.0001  | -0.0196          | 0.0016 | <.0001  | -0.0156         | 0.0014 | <.0001  |
|                | L0L1      | -0.4572          | 0.2324 | 0.0494  | -0.4602         | 0.1862 | 0.0136  | 0.2987           | 0.1660 | 0.0721  | 0.1118          | 0.1343 | 0.4051  |
|                | AGE*L0L1  | 0.0141           | 0.0051 | 0.0055  | 0.0125          | 0.0041 | 0.0026  | -0.0061          | 0.0035 | 0.0837  | -0.0022         | 0.0029 | 0.4309  |
| L2 vs. Other   | AGE       | -0.0268          | 0.0026 | <.0001  | -0.0216         | 0.0021 | <.0001  | -0.0231          | 0.0017 | <.0001  | -0.0177         | 0.0014 | <.0001  |
|                | L2        | 0.0439           | 0.2172 | 0.8400  | 0.0720          | 0.1713 | 0.6742  | -0.2918          | 0.1476 | 0.0481  | -0.2231         | 0.1189 | 0.0608  |
|                | AGE*L2    | -0.0012          | 0.0048 | 0.7933  | -0.0019         | 0.0038 | 0.6094  | 0.0078           | 0.0032 | 0.0146  | 0.0062          | 0.0026 | 0.0159  |
| L3 vs. Other   | AGE       | -0.0247          | 0.0027 | <.0001  | -0.0197         | 0.0022 | <.0001  | -0.0206          | 0.0019 | <.0001  | -0.0154         | 0.0015 | <.0001  |
|                | L3        | 0.2699           | 0.2002 | 0.1780  | 0.2942          | 0.1590 | 0.0645  | -0.0071          | 0.1387 | 0.9590  | 0.0269          | 0.1114 | 0.8089  |
|                | AGE*L3    | -0.0076          | 0.0045 | 0.0927  | -0.0076         | 0.0036 | 0.0374  | -0.0006          | 0.0030 | 0.8460  | -0.0016         | 0.0024 | 0.5060  |

<sup>a</sup> Models adjusted for BMI, time-varying HOMA-IR, and genetic ancestry components

<sup>b</sup> Models adjusted for BMI, time-varying HOMA-IR, CD4 counts, detectable HIV RNA, cART use, and genetic ancestry components

\*Genetic ancestry components were evaluated with principal component analysis using 168 ancestry informative markers and the first 2 components were adjusted for in the models.

Supplementary Figure F-1. HOMA-B, HOMA-IR at Index Visit and Probability of Diabetes Mellitus during follow-up in WIHS by HIV status

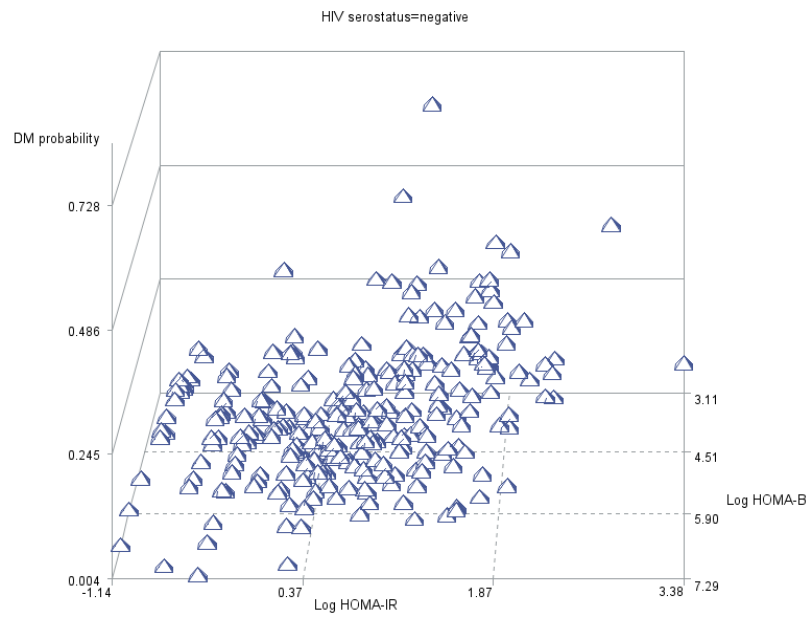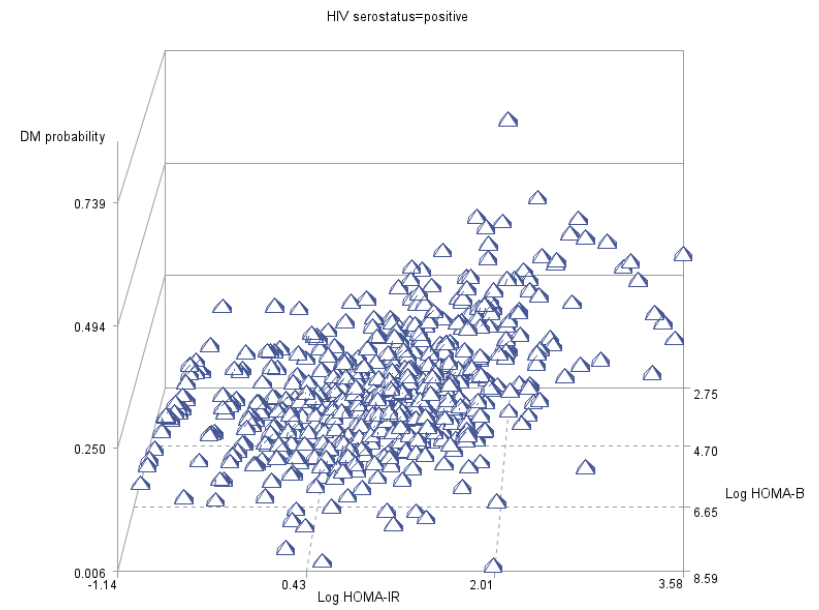

Supplementary Figure F-2. Cumulative Incidence of Diabetes Mellitus by Mitochondrial DNA Haplogroups L1L0 and HIV serostatus in WIHS

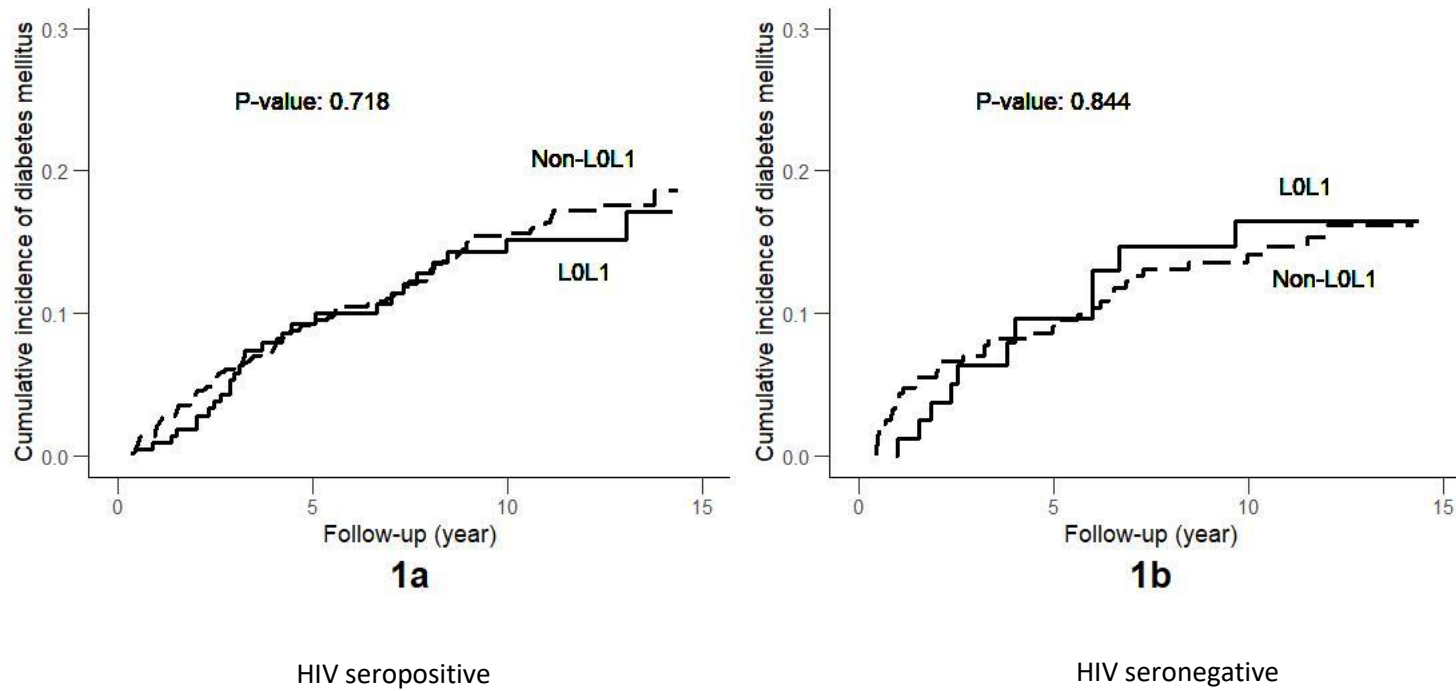

Supplementary Figure F-3. Cumulative Incidence of Diabetes Mellitus by Mitochondrial DNA Haplogroups L3 and HIV serostatus in WIHS

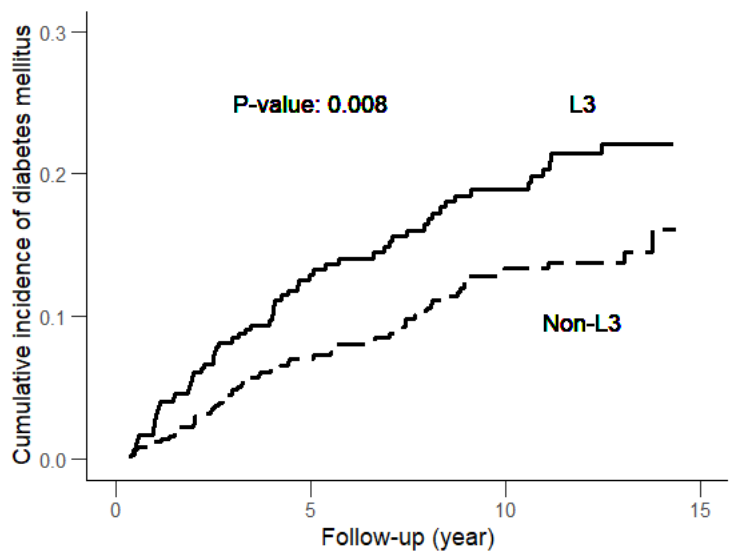

**1a**

HIV seropositive

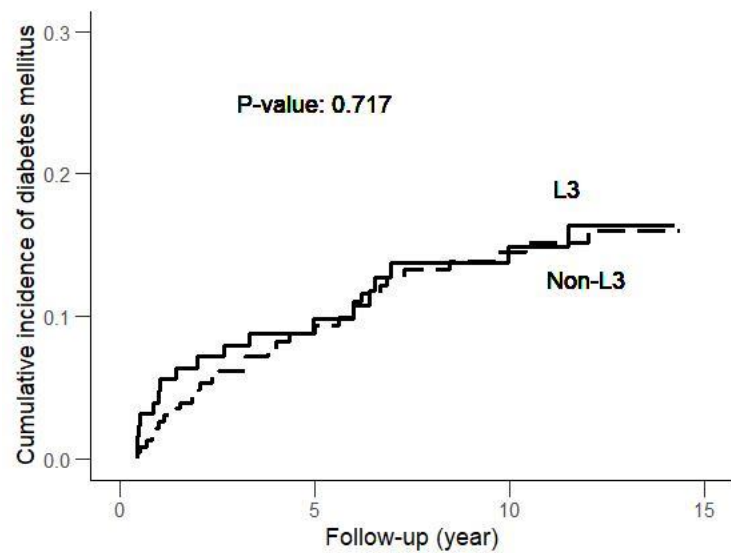

**1b**

HIV seronegative
